# Supplementary material for: A new characterization of the North Atlantic eddy-driven jet using 2-dimensional moment analysis
Source: Copernicus journal article supplement (doi:10.5194/egusphere-2024-318), 2024-02-20
Supplement: Supplementary file 1 [file egusphere-2024-318-supplement.pdf]

# A new characterization of the North Atlantic eddy-driven jet using 2-dimensional moment analysis - Supplementary Information

February 19, 2024

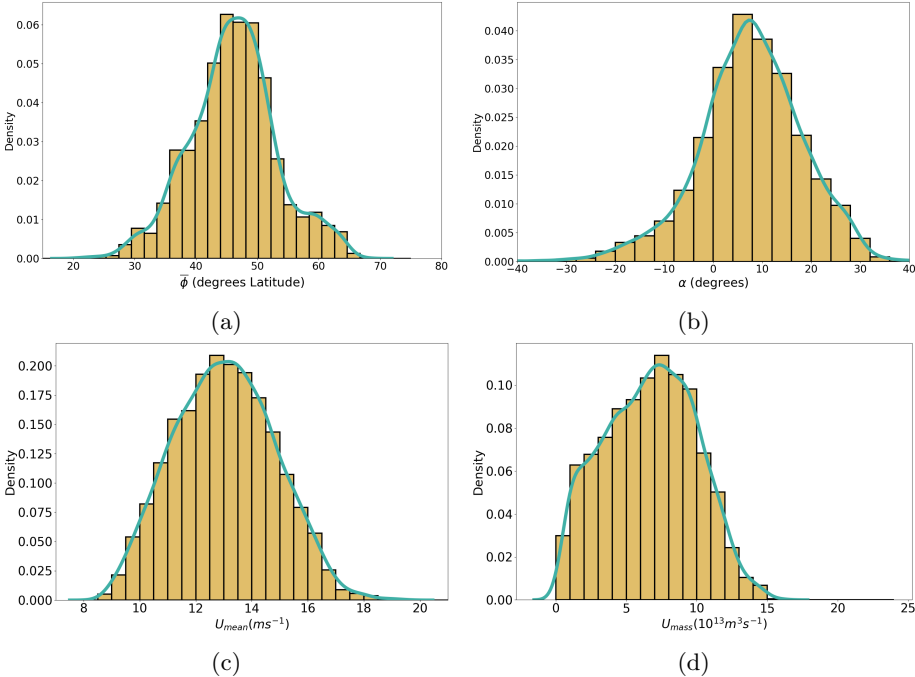

Figure S1: Distributions of (a)  $\bar{\phi}$ , (b)  $\alpha$ , (c)  $U_{\text{mean}}$  and (d)  $U_{\text{mass}}$  which includes values on multiple objects days.

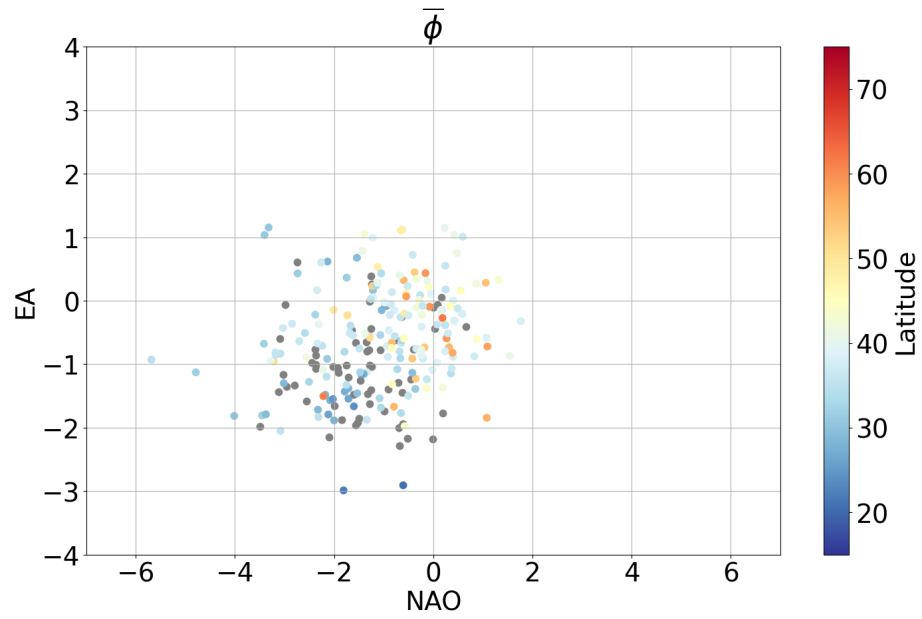

Figure S2: Scatter plot of days with zero or two objects defined. Points that are coloured by  $\bar{\phi}$  represent days with two regions and grey points are days with no regions.
